# Supplementary material
Source: publisher figshare collection journal article supplement (https://frontiersin.figshare.com/ndownloader/files/15141860)
Supplement: Supplementary file 1 [file 15141860]

**Electronic Supplementary Material S2: Endemic taxa contributing to the score of a consensus area of endemism.**

**INFORMATION ON CONSENSUS AREAS**

**West-Taurus AE** (from 17 areas), 107 species give score:

32 Acinos troodi (Post) Leblebici (32): (0.000-0.750)

41 Alkanna attilae P.H.Davis (41): (0.000-0.700)

57 Alkanna phrygia Bornm. (57): (0.000-0.700)

65 Alkanna tinctoria (L.) Tausch subsp. subleiocarpa (Hub.-Mor.) Hub.-Mor. (65): (0.000-0.571)

71 Amphoricarpos exsul O. Schwarz (71): (0.000-0.667)

72 Amphoricarpos praedictus Ayaşligil & Grierson (72): (0.000-0.667)

82 Anthemis ammophila Boiss. & Heldr. (82): (0.000-0.750)

97 Anthemis cretica L. subsp. leucanthemoides (Boiss.) Grierson (97): (0.000-0.467)

103 Anthemis dipsacea Bornm. (103): (0.000-0.750)

117 Anthemis pestalozzae Boiss. (117): (0.000-0.700)

119 Anthemis rosea Sm. subsp. carnea (119): (0.000-0.542)

128 Ballota cristata P.H.Davis (128): (0.000-0.750)

129 Ballota glandulosissima Hub.-Mor. & Patzak (129): (0.000-0.500)

130 Ballota inaequidens Hub.-Mor. & Patzak (130): (0.000-0.667)

132 Ballota latibracteolata P.H.Davis & Doroszenko (132): (0.000-0.643)

135 Ballota pseudodictamnus (L.) Bentham (135): (0.000-0.500)

152 Cardus rechingeranus Kazmi (152): (0.000-0.917)

153 Carlina oligocephala subsp. pallescens (Wettst.) Meusel & Kästner (153): (0.000-0.667)

155 Centaurea acicularis Sm. var. urvillei Boiss. (155): (0.000-0.750)

182 Centaurea cariensis Boiss. subap. microlepis (Boiss.) Wagenitz (182): (0.000-0.667)

183 Centaurea cariensis Boiss. subsp. cariensis (183): (0.000-0.750)

184 Centaurea cariensis Boiss. subsp. longipapposa Wagenitz (184): (0.000-0.563)

185 Centaurea cariensis Boiss. subsp. maculiceps (O.Schwarz) Wagenitz (185): (0.000-0.786)

194 Centaurea deflexa Wagenitz (194): (0.000-0.700)

197 Centaurea dichroa Boiss. & Heldr. (197): (0.000-0.667)

199 Centaurea drabifolia Sm. subsp. austro-occidentalis Wagenitz (199): (0.000-0.600)

206 Centaurea ensiformis P.H.Davis (206): (0.000-0.750)

224 Centaurea hierapolitana Boiss. (224): (0.000-0.667)

240 Centaurea luschaniana Heimerl (240): (0.000-0.667)

244 Centaurea lydia Boiss. (244): (0.000-0.500)

248 Centaurea mathiolifolia Boiss. (248): (0.000-0.688)

263 Centaurea pinetorum Hub.-Mor. (263): (0.000-0.667)

276 Centaurea reuterana Boiss. var. reuterana (276): (0.000-0.722)

289 Centaurea solstitialls L. subsp. pyracantha (Boiss.) Wagenitz (289): (0.000-0.786)

312 Chrysophthalmum dichotomum Boiss. & Heldr. (312): (0.000-0.667)

325 Cirsium dranilense R.M.Burton (325): (0.000-0.800)

371 Cousinia iconica Hub.-Mor. (371): (0.000-0.409)

395 Doronicum cacaliifolium Boiss. &Heldr. (395): (0.000-0.667)

407 Echinops emiliae O.Schwarz ex P.H.Davis (407): (0.000-0.667)

433 Helichrysum compactum Boiss. (433): (0.000-0.667)

438 Helichrysum pamphylicum P.H.Davis & Kupicha (438): (0.000-0.464)

440 Helichrysum plicatum DC. (440): (0.000-0.667)

496 Hieracium phrygiense Sell & West (496): (0.000-0.667)

530 Jurinea cadmea Boiss. (530): (0.000-0.667)

547 Lamium eriocephalum Bentham subsp. glandulosidens (Hub.-Mor.) R.R.Mill (547): (0.000-0.750)

552 Lamium lycium Boiss. (552): (0.000-0.667)

554 Lamium microphyllum Boiss. (554): (0.000-0.750)

555 Lamium moschatum Miller. var. rhodium (Gand.) R.R.Mill (555): (0.000-0.500)

556 Lamium pisidicum R.R.Mill (556): (0.000-0.500)

568 Marrubium bourgaei Boiss. subsp. bourgaei (568): (0.000-0.667)

574 Marrubium globosum Montbret & Aucher ex Bentham subsp. micranthum (Boiss. & Heldr.) (574): (0.000-0.714)

576 Marrubium lutescens Boiss. (576): (0.000-0.382)

577 Marrubium rotundifolium Boiss (577): (0.000-0.714)

587 Micromeria cristata (Hampe) Griseb. subsp. xylorrhiza (Boiss. & Heldr.) (587): (0.000-0.833)

599 Nepeta cadmea Boiss. (599): (0.000-0.577)

606 Nepeta isaurica Boiss. & Heldr. (606): (0.000-0.667)

607 Nepeta nuda L. subsp. glandulifera Hub.-Mor. & P.H.Davis (607): (0.000-0.643)

608 Nepeta nuda L. subsp. lydiae P.H.Davis (608): (0.000-0.800)

611 Nepeta pilinux P.H.Davis (611): (0.000-0.750)

615 Nepeta viscida Boiss. (615): (0.000-0.722)

624 Omphalodes luciliae Boiss. subsp. luciliae (624): (0.000-0.900)

626 Omphalodes ripleyana P.H.Davis (626): (0.000-0.667)

628 Onopordum boissieri Willk. (628): (0.000-0.550)

659 Onosma lycaonicum Hub.-Mor. (659): (0.000-0.833)

692 Origanum hypericifolium O. Schwarz & P.H.Davis (692): (0.000-0.750)

695 Origanum minutiflorum O. Schwarz & P.H.Davis (695): (0.000-0.667)

696 Origanum saccatum P.H.Davis (696): (0.000-0.667)

723 Phlomis angustissima Hub.-Mor. (723): (0.000-0.875)

724 Phlomis bourgaei Boiss. (724): (0.000-0.636)

728 Phlomis chimerae Boissieu (728): (0.000-0.667)

730 Phlomis grandiflora H.S. Thompson var. fimbrilligera (Hub.-Mor.) Hub.-Mor. (730): (0.000-0.700)

735 Phlomis monocephala P.H.Davis (735): (0.000-0.500)

741 Picris campylocarpa Boiss. & Heldr. (741): (0.000-0.917)

742 Picris olympica Boiss. (742): (0.000-0.462)

765 Salvia adenophylla Hedge & Hub.-Mor. (765): (0.000-0.667)

774 Salvia cedronella Boiss. (774): (0.000-0.500)

775 Salvia chionantha Boiss. (775): (0.000-0.667)

776 Salvia chrysophylla Stapf (776): (0.000-0.750)

786 Salvia halophila Hedge (786): (0.000-0.500)

798 Salvia pisidica Boiss. & Heldr. ex Bentham (798): (0.000-0.750)

799 Salvia potentillifolia Boiss. & Heldr. (799): (0.000-0.667)

807 Salvia smyrnaea Boiss. (807): (0.000-0.688)

840 Scorzonera longiana Sümbül (840): (0.000-0.650)

847 Scorzonera suberosa C.Koch subsp. cariensis (Boiss.) Chamberlain (847): (0.000-0.571)

865 Scutellaria rubicunda Hornem. subsp. brevibractea (Stapf) J.R.Edm. (865): (0.000-0.650)

897 Sideritis albiflora Hub.-Mor. (897): (0.000-0.667)

899 Sideritis arguta Boiss. & Heldr. (899): (0.000-0.667)

902 Sideritis bilgerana P.H.Davis (902): (0.000-0.667)

906 Sideritis condensata Boiss. &Heldr. (906): (0.000-0.667)

907 Sideritis congesta P.H.Davis & Hub.-Mor (907): (0.000-0.750)

927 Sideritis tmolea P.H.Davis (927): (0.000-0.750)

933 Stachys aleurites Boiss. & Heldr. (933): (0.000-0.667)

937 Stachys bombycina Boiss. (937): (0.000-0.650)

962 Stachys pinardii Boiss. (962): (0.000-0.750)

978 Symphytum anatolicum Boiss. (978): (0.000-0.455)

991 Tanacetum cadmeum (Boiss.) Heywood subsp. cadmeum (991): (0.000-0.636)

1011 Tanacetum praeteritum (Horwood) Heywood subsp. massicyticum Heywood (1011): (0.000-0.667)

1012 Tanacetum praeteritum (Horwood) Heywood subsp. praeteritum (1012): (0.000-0.667)

1033 Teucrium alyssifolium Stapf (1033): (0.000-0.667)

1040 Teucrium montbretii Bentham (1040): (0.000-0.500)

1041 Teucrium odontites Boiss. & Bal. (1041): (0.000-0.667)

1045 Teucrium sandrasicum O. Schwarz (1045): (0.000-0.750)

1048 Thymbra spicata L. var. intricata P.H.Davis (1048): (0.000-0.875)

1069 Thymus revolutus Čelak. (1069): (0.000-0.667)

1071 Thymus sipyleus Boiss. var. davisianus (1071): (0.000-0.667)

1098 Trogopogon olympicus Boiss. (1098): (0.000-0.417)

1102 Ziziphora taurica Bieb. subsp. cleonioides (Boiss.) (1102): (0.000-0.833)

**Anatolian Diagonal AE** (from 37 areas), 125 species give score:

2 Achillea aleppica DC. subsp. zederbaueri (2): (0.000-0.344)

3 Achillea armenorum Boiss. & Hausskn. (3): (0.000-0.700)

8 Achillea cucullata (Hausskn.) Bornm. (8): (0.000-0.813)

10 Achillea goniocephala Boiss. & Bal. (10): (0.000-0.786)

16 Achillea magnifica Hub.-Mor. (16): (0.000-0.611)

24 Achillea pseudoaleppica Hub.-Mor. (24): (0.000-0.700)

26 Achillea sieheana Stapf (26): (0.000-0.563)

27 Achillea sintenisii Hub.-Mor. (27): (0.000-0.667)

30 Achillea spinulifolia Fenzl ex Boiss. (30): (0.000-0.750)

34 Ajuga chamaepitys (L.) Schreber subsp. euphratica P.H.Davis (34): (0.000-0.833)

43 Alkanna cappadocia Boiss. & Bal. (43): (0.000-0.833)

53 Alkanna megacarpa DC. (53): (0.000-0.875)

62 Alkanna sieheana Rech.f. (62): (0.000-0.667)

85 Anthemis arenicola Boiss. var. arenicola (85): (0.000-0.750)

104 Anthemis fimbriata Boiss. (104): (0.000-0.500)

118 Anthemis pungens Yavin (118): (0.000-0.900)

121 Anthemis tinctoria L. var. virescens Bornm. (121): (0.000-0.750)

122 Anthemis tricornis Eig (122): (0.000-0.500)

132 Ballota latibracteolata P.H.Davis & Doroszenko (132): (0.000-0.667)

137 Ballota saxatilis Sieber ex J. & C. Presl. subsp. brachyodonta (Boiss.) P.H.Davis & Doroszenko (137): (0.000-0.500)

142 Calamintha tauricola P.H.Davis (142): (0.000-0.667)

160 Centaurea amanicola Hub.-Mor. (160): (0.000-0.667)

165 Centaurea antitauri Hayek (165): (0.000-0.800)

170 Centaurea aucherana DC. (170): (0.000-0.643)

191 Centaurea chrysantha Wagenitz (191): (0.000-0.750)

196 Centaurea derderiifolia Wagenitz (196): (0.000-0.667)

233 Centaurea kotschyi (Boiss. & Heldr.) Hayek var. decumbens Wagenitz (233): (0.000-0.500)

234 Centaurea kotschyi (Boiss. & Heldr.) Hayek var. floccosa (Boiss.) Wagenitz (234): (0.000-0.700)

237 Centaurea lanigera DC. (237): (0.000-0.533)

243 Centaurea lycopifolia Boiss. & Kotschy (243): (0.000-0.917)

263 Centaurea pinetorum Hub.-Mor. (263): (0.000-0.667)

270 Centaurea ptosimopappa Hayek (270): (0.000-0.750)

287 Centaurea sivasica Wagenitz (287): (0.000-0.667)

289 Centaurea solstitialls L. subsp. pyracantha (Boiss.) Wagenitz (289): (0.000-0.563)

295 Centaurea tomentella Hand.-Mazz. (295): (0.000-0.800)

315 Cicerbita revirostris (Schultz Bip. ex Vis. & Panč.) C.Jeffrey (315): (0.000-0.750)

354 Cousinia aucheri DC. (354): (0.000-0.714)

356 Cousinia birandiana Hub.-Mor. (356): (0.000-0.688)

358 Cousinia caesarea Boiss. & Bal. (358): (0.000-0.550)

359 Cousinia cataonica Boiss. & Hausskn. (359): (0.000-0.700)

360 Cousinia cirsioides Boiss. & Bal. (360): (0.000-0.667)

362 Cousinia decolorans Freyn & Sint. (362): (0.000-0.667)

367 Cousinia foliosa Boiss. & Bal. (367): (0.000-0.556)

371 Cousinia iconica Hub.-Mor. (371): (0.000-0.563)

372 Cousinia intertexta Freyn & Sint. (372): (0.000-0.750)

376 Cousinia sivasica Hub.-Mor. (376): (0.000-0.667)

397 Doronicum haussknechtii Cavill. (397): (0.000-0.700)

414 Echinops vaginatus Boiss. & Hausskn. (414): (0.000-0.700)

418 Erigeron zederbaueri Vierh. (418): (0.000-0.667)

419 Galatella amani (Post) Grierson (419): (0.000-0.750)

454 Hieracium autranii G.E.Post (454): (0.000-0.750)

455 Hieracium barbeyi G.E.Post (455): (0.000-0.750)

520 Inula fragilis Boiss. & Hausskn. (520): (0.000-0.500)

546 Lamium eriocephalum Bentham subsp. eriocephalum (546): (0.000-0.750)

547 Lamium eriocephalum Bentham subsp. glandulosidens (Hub.-Mor.) R.R.Mill (547): (0.000-0.500)

549 Lamium garganicum L. subsp. nepetifolium (Boiss.) (549): (0.000-0.625)

550 Lamium garganicum L. subsp. pulchrum R.R.Mill (550): (0.000-0.667)

565 Leontodon oxylepis Boiss. & Heldr. var. divaricatus (Boiss.) Kupicha (565): (0.000-0.542)

566 Leucocyclus formosus Boiss. subsp. amanicus (Rech.f.) Hub.-Mor. (566): (0.000-0.750)

584 Micromeria cremnophila Boiss. & Heldr. subsp. amana (Rech.f.) P.H.Davis (584): (0.000-0.875)

595 Myopordon thiebautii (Genty) Wagenitz (595): (0.000-0.750)

597 Nepeta aristata Boiss. & Kotschy ex Boiss. (597): (0.000-0.800)

631 Onopordum davisii Rech.f. (631): (0.000-0.500)

633 Onopordum polycephalum Boiss. (633): (0.000-0.458)

640 Onosma argentatum Hub.-Mor. (640): (0.000-0.667)

653 Onosma inexspectatum Teppner (653): (0.000-0.900)

654 Onosma intertextum Hub.-Mor. (654): (0.000-0.500)

658 Onosma liparioides DC. (658): (0.000-0.643)

659 Onosma lycaonicum Hub.-Mor. (659): (0.000-0.833)

676 Onosma rutilum Hub.-Mor. (676): (0.000-0.750)

691 Origanum haussknechtii Boiss. (691): (0.000-0.800)

693 Origanum leptocladum Boiss. (693): (0.000-0.667)

699 Paracaryum amani (Rech.f.) R.R.Mill (699): (0.000-0.750)

708 Paracaryum erysimifolium Boiss. (708): (0.000-0.667)

712 Paracaryum lithospermifolium (Lam.) Grande. var. erectum R.R.Mill (712): (0.000-0.643)

721 Paracaryum stenolophum Boiss. (721): (0.000-0.667)

735 Phlomis monocephala P.H.Davis (735): (0.000-0.750)

737 Phlomis oppositiflora Boiss. & Hausskn. (737): (0.000-0.700)

738 Phlomis physocalyx Hub.-Mor. (738): (0.000-0.700)

768 Salvia aucheri Bentham. var. aucheri (768): (0.000-0.667)

770 Salvia blepharochlaena Hedge & Hub.-Mor. (770): (0.000-0.458)

777 Salvia cilicica Boiss. & Kotschy (777): (0.000-0.688)

783 Salvia eriophora Boiss. & Kotschy (783): (0.000-0.667)

786 Salvia halophila Hedge (786): (0.000-0.750)

789 Salvia heldreichiana Boiss. ex Bentham (789): (0.000-0.450)

795 Salvia modesta Boiss. (795): (0.000-0.667)

797 Salvia pilifera Montbret & Aucher (797): (0.000-0.667)

819 Scorzonera acantholimon Hand.-Mazz. (819): (0.000-0.700)

835 Scorzonera hieraciifolia Hayek (835): (0.000-0.550)

838 Scorzonera lacera Boiss. & Bal. (838): (0.000-0.500)

855 Scutellaria glaphyrostachys Rech.f. (855): (0.000-0.750)

875 Senecio farfarifolius Boiss. & Kotschy (875): (0.000-0.563)

876 Senecio hypochionaeus Boiss. var. argaeus (Boiss. & Bal.) Matthews (876): (0.000-0.409)

881 Senecio jurineifolius Boiss. & Bal. (881): (0.000-0.750)

890 Senecio tauricolus Matthews (890): (0.000-0.625)

902 Sideritis bilgerana P.H.Davis (902): (0.000-0.667)

904 Sideritis brevidens P.H.Davis (904): (0.000-0.667)

905 Sideritis cilicica Boiss. & Bal. (905): (0.000-0.667)

920 Sideritis phlomoides Boiss. & Bal. (920): (0.000-0.667)

923 Sideritis rubriflora Hub.-Mor. (923): (0.000-0.667)

924 Sideritis serratifolia Hub.-Mor. (924): (0.000-0.667)

934 Stachys amanica P.H.Davis (934): (0.000-0.875)

939 Stachys burgsdorffioides (Bentham) Boiss. subsp. ladanoides Hand.-Mazz. (939): (0.000-0.800)

940 Stachys cataonica Bhattacharjee & Hub.-Mor. (940): (0.000-0.700)

949 Stachys euadenia P.H.Davis (949): (0.000-0.667)

953 Stachys inanis Hausskn. & Bornm. (953): (0.000-0.700)

963 Stachys pseudopinardii Bhattacharjee & Hub.-Mor. (963): (0.000-0.667)

964 Stachys pumila Banks & Sol (964): (0.000-0.833)

966 Stachys ramosissima Montbret & Aucher ex Bentham (966): (0.000-0.800)

968 Stachys rupestris Montbret & Aucher ex Bentham (968): (0.000-0.750)

972 Stachys sparsipilosa Bhattacharjee & Hub.-Mor. (972): (0.000-0.563)

977 Symphytum aintabicum Hub.-Mor. & Wickens (977): (0.000-0.750)

993 Tanacetum cappadocicum (DC.) Schultz Bip. (993): (0.000-0.643)

994 Tanacetum densum (Lab.) Schultz Bip. subsp. amani Heywood (994): (0.000-0.650)

995 Tanacetum densum (Lab.) Schultz Bip. subsp. eginense Heywood (995): (0.000-0.688)

999 Tanacetum eginense (Hausskn. ex Bornm.) Grierson (999): (0.000-0.667)

1002 Tanacetum haradjanii (Rech.f.) Grierson (1002): (0.000-0.750)

1020 Taraxacum farinosum Hausskn. & Bornm. (1020): (0.000-0.500)

1024 Taraxacum pseudonigricans Hand.-Mazz. (1024): (0.000-0.643)

1049 Thymus argaeus Boiss. & Bal. (1049): (0.000-0.667)

1053 Thymus cappadocicus Boiss. var. cappadocicus (1053): (0.000-0.688)

1065 Thymus pectinatus Fisch. & Mey. var. pectinatus (1065): (0.000-0.750)

1067 Thymus pubescens Boiss. & Kotschy ex Čelak. var. cratericola Jalas (1067): (0.000-0.667)

1073 Thymus spathulifolius Hausskn. & Velen. (1073): (0.000-0.700)

1089 Tripleurospermum kotschyi (Boiss.) E.Hossain (1089): (0.000-0.750)

**Pontic-Ala AE** (from 13 areas), 53 species give score:

25 Achillea schischkinii Sosn. (25): (0.000-0.676)

44 Alkanna cordifolia C.Koch (44): (0.000-0.500)

83 Anthemis anthemiformis (Freyn & Sint.) Grierson (83): (0.000-0.500)

89 Anthemis calcarea Sosn. var. calcarea (89): (0.000-0.750)

90 Anthemis calcarea Sosn. var. discoidea Grierson (90): (0.000-0.750)

111 Anthemis melanoloma Trautv. subsp. trapezuntica Grierson (111): (0.000-0.667)

136 Ballota rotundifolia C.Koch (136): (0.000-1.000)

143 Callicephalus nitens (Bieb. ex Willd.) C.A.Mey. (143): (0.000-0.750)

144 Cardus acanthoides subsp. sintenisii Kazmi (144): (0.000-0.750)

167 Centaurea appendicigera C.Koch (167): (0.000-0.667)

169 Centaurea armena Boiss. (169): (0.000-0.600)

209 Centaurea fenzlii Reichardt (209): (0.000-0.571)

221 Centaurea hedgei Wagenitz (221): (0.000-0.750)

222 Centaurea helenioides Boiss. (222): (0.000-0.750)

277 Centaurea rhizocalathium (C.Koch) Tchihat. (277): (0.000-0.667)

279 Centaurea schischkinii Tzvelev (279): (0.000-0.750)

305 Centaurea woronowii Bornm. (305): (0.000-0.750)

314 Cicerbita boissieri (Rouy) C.Jeffrey (314): (0.000-0.667)

339 Cirsium pseudopersonata Boiss. & Bal. subsp. pseudopersonata (339): (0.000-0.750)

346 Cirsium sommieri Petrak (346): (0.000-0.708)

348 Cirsium trachylepis Boiss. (348): (0.000-0.667)

355 Cousinia bicolor Freyn & Sint. (355): (0.000-0.650)

362 Cousinia decolorans Freyn & Sint. (362): (0.000-0.667)

379 Cousinia woronowii Bornm. (379): (0.000-0.583)

392 Doronicum balansae Cavill. (392): (0.000-0.688)

466 Hieracium erythrocarpum Peter (466): (0.000-0.750)

468 Hieracium gentiliforme (Zahn) Sell & West (468): (0.000-0.625)

487 Hieracium microtum Boiss. (487): (0.000-0.667)

529 Jurinea brevicaulis Boiss. (529): (0.000-0.667)

532 Jurinea cataonica Boiss. & Hausskn. (532): (0.000-0.531)

548 Lamium galactophyllum Boiss. & Reuter (548): (0.000-0.875)

559 Lamium sulfureum Hausskn. & Sint. ex R.R.Mill (559): (0.000-0.667)

590 Micromeria elliptica C.Koch (590): (0.000-0.875)

594 Mulgedium quercinum (L.) C.Jeffrey (594): (0.000-0.667)

621 Nonea pulmonarioides Boiss. & Bal. (621): (0.000-0.667)

666 Onosma obtusifolium Hausskn. &Sint. ex H.Riedl (666): (0.000-0.667)

705 Paracaryum corymbiforme (DC. & A.DC.) Boiss. (705): (0.000-0.688)

706 Paracaryum cristatum (Schreber) Boiss. subsp. cristatum (706): (0.000-0.633)

708 Paracaryum erysimifolium Boiss. (708): (0.000-0.667)

711 Paracaryum leptophyllum (A.DC.) Boiss. (711): (0.000-0.750)

790 Salvia huberi Hedge (790): (0.000-0.750)

793 Salvia longipedicellata Hedge (793): (0.000-0.471)

803 Salvia rosifolia Sm. (803): (0.000-0.900)

872 Senecio cilicius Boiss. (872): (0.000-0.500)

886 Senecio platyphyllus DC. var. glandulosus Matthew (886): (0.000-0.667)

889 Senecio taraxacifolius (Bieb.) DC. var. discoideus Matthews (889): (0.000-0.464)

901 Sideritis armeniaca Bornm. (901): (0.000-0.667)

955 Stachys laetivirens Kotschy & Boiss. (955): (0.000-0.667)

979 Symphytum armeniacum Bucknall (979): (0.000-0.600)

983 Symphytum longipetiolatum Wickens (983): (0.000-0.667)

986 Symphytum sylvaticum Boiss. (986): (0.000-0.750)

1005 Tanacetum mucroniferum Hub.-Mor. & Grierson (1005): (0.000-0.542)

1084 Tripleurospermum fissurale (Sosn.) E.Hossain (1084): (0.000-0.750)

**Hakkari AE** (from 1 areas), 12 species give score:

21 Achillea nobilis L. subsp. kurdica Hub.-Mor. (21): (0.500)

217 Centaurea hakkariensis Wagenitz (217): (0.750)

229 Centaurea karduchorum Boiss. (229): (0.375)

239 Centaurea longifimbriata Wagenitz (239): (0.750)

311 Chondrilla spinosa Lamond & Matthews (311): (0.750)

368 Cousinia hakkarica Hub.-Mor. (368): (0.750)

373 Cousinia nabelekii Bornm. (373): (0.750)

374 Cousinia satdagensis Hub.-Mor. (374): (0.875)

378 Cousinia vanensis Hub.-Mor. (378): (0.750)

792 Salvia kronenburgii Rech.f. (792): (0.750)

830 Scorzonera davisii Lipschitz (830): (0.750)

931 Solenanthus formosus R.R.Mill (931): (0.750)
